# Supplementary material for: Structural characterization and catalytic evaluation of transition and rare earth metal doped ceria-based solid solutions for elemental mercury oxidation
Source: Royal Society of Chemistry journal article supplement (doi:10.1039/c3ra41441h), 2013-01-01
Supplement: c3ra41441h.pdf [file c3ra41441h.pdf]

## **Electronic Supplementary Information**

### **Structural characterization and catalytic evaluation of transition and rare earth metal doped ceria-based solid solutions for elemental mercury oxidation**

**Deshetti Jampaiah<sup>a</sup>, Katie M. Tur<sup>b</sup>, Samuel J. Ippolito<sup>b</sup>, Ylias M. Sabri<sup>b</sup>, James Tardio<sup>b</sup>, Suresh K. Bhargava<sup>b</sup>, and Benjaram M. Reddy<sup>a\*</sup>**

*<sup>a</sup>Inorganic and Physical Chemistry Division, CSIR – Institute of Chemical Technology, Uppal Road, Hyderabad – 500 607, India*

*<sup>b</sup>Centre for Advanced Materials & Industrial Chemistry (CAMIC), School of Applied Sciences, RMIT University, GPO BOX 2476, Melbourne-3001, Australia*

\*Author to whom correspondence should be addressed. Phone: +91 40 2719 1714. Fax: +91 40 2716 0921. E-mail: bmreddy@iict.res.in, mreddyb@yahoo.com

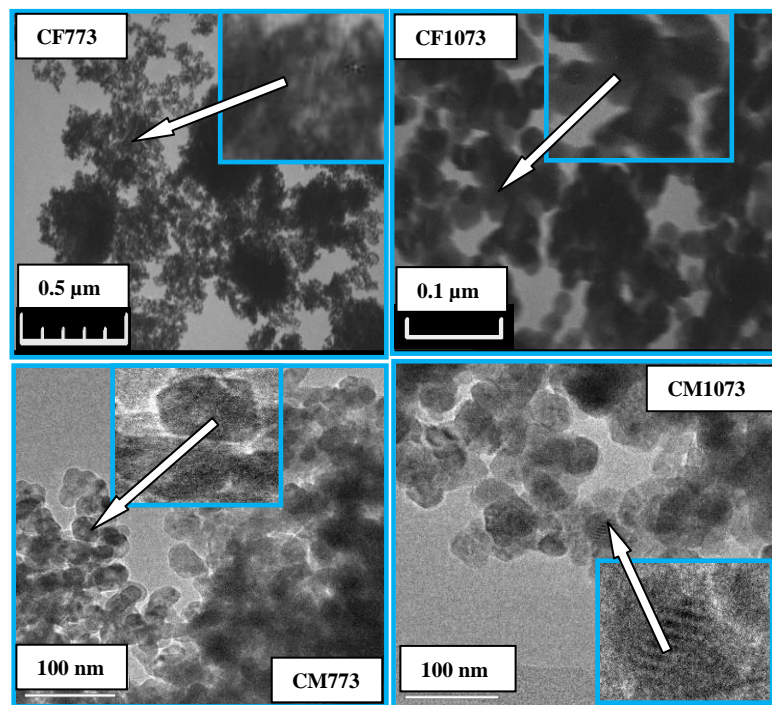

**Fig. S1** TEM images of  $\text{Ce}_{0.8}\text{Fe}_{0.2}\text{O}_{2-\delta}$  (CF), and  $\text{Ce}_{0.7}\text{Mn}_{0.3}\text{O}_{2-\delta}$  (CM) catalysts calcined at 773 and 1073 K.

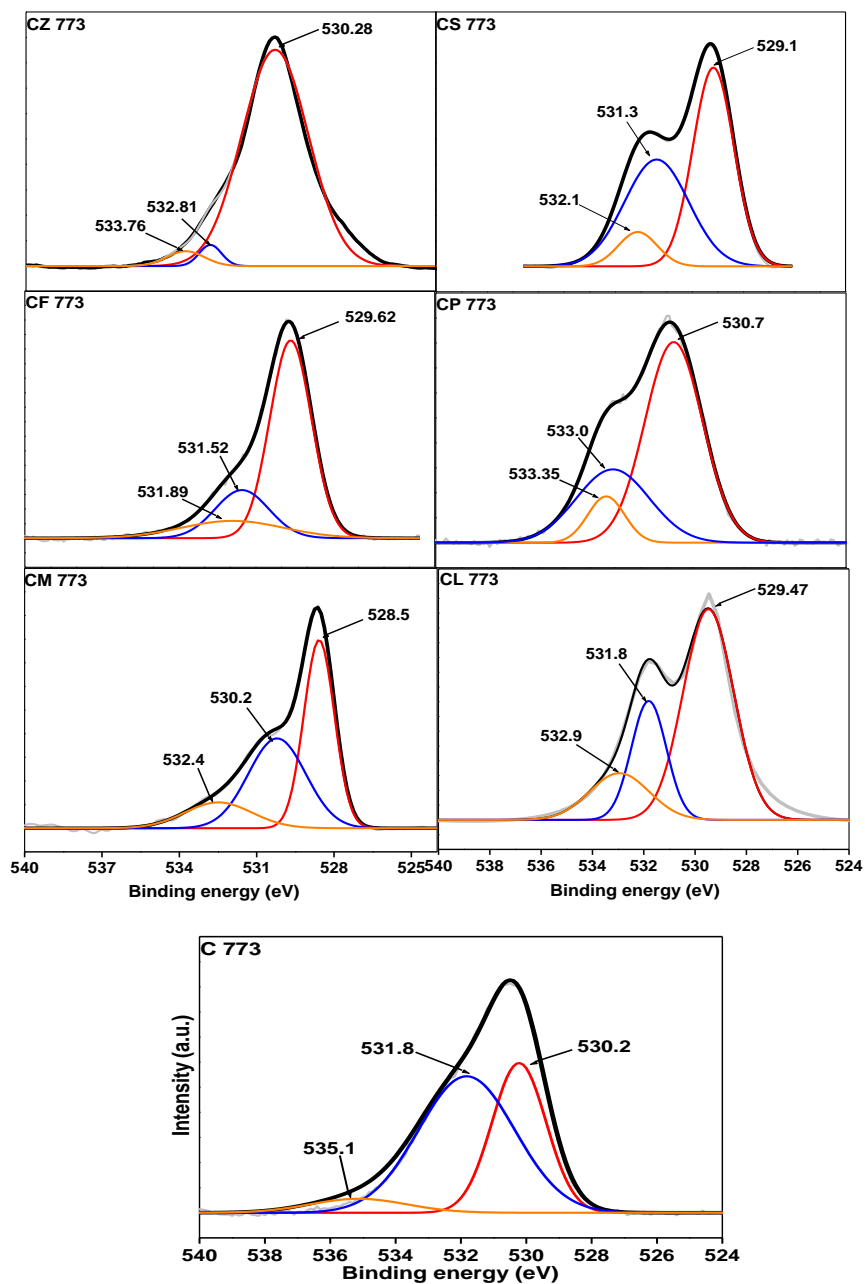

**Fig. S2** O 1s XPS spectra of pure ceria (C),  $\text{Ce}_{0.7}\text{Mn}_{0.3}\text{O}_{2-\delta}$  (CM),  $\text{Ce}_{0.8}\text{Fe}_{0.2}\text{O}_{2-\delta}$  (CF),  $\text{Ce}_{0.75}\text{Zr}_{0.25}\text{O}_2$  (CZ),  $\text{Ce}_{0.8}\text{La}_{0.2}\text{O}_{2-\delta}$  (CL),  $\text{Ce}_{0.8}\text{Pr}_{0.2}\text{O}_{2-\delta}$  (CP), and  $\text{Ce}_{0.8}\text{Sm}_{0.2}\text{O}_{2-\delta}$  (CS) catalysts calcined at 773 K.

**Table S1.** Binding energies and surface atomic concentrations of  $\text{Ce}_{0.7}\text{Mn}_{0.3}\text{O}_{2-\delta}$  (CM),  $\text{Ce}_{0.8}\text{Fe}_{0.2}\text{O}_{2-\delta}$  (CF),  $\text{Ce}_{0.75}\text{Zr}_{0.25}\text{O}_2$  (CZ),  $\text{Ce}_{0.8}\text{La}_{0.2}\text{O}_{2-\delta}$  (CL),  $\text{Ce}_{0.8}\text{Pr}_{0.2}\text{O}_{2-\delta}$  (CP),  $\text{Ce}_{0.8}\text{Sm}_{0.2}\text{O}_{2-\delta}$  (CS), and pure ceria (C) catalysts calcined at 773 K.

| catalyst | Ce 3d (u''') eV | O 1s ( $\text{O}_A$ ) eV | surface atomic concentration (%) |              |              |
|----------|-----------------|--------------------------|----------------------------------|--------------|--------------|
|          |                 |                          | $\text{O}_A$                     | $\text{O}_B$ | $\text{O}_C$ |
| CM 773 K | 916.1           | 528.5                    | 45.5                             | 40.8         | 13.7         |
| CF 773 K | 916.9           | 529.6                    | 65.5                             | 20.5         | 14           |
| CZ 773 K | 916.7           | 530.2                    | 93.4                             | 3.0          | 3.6          |
| CL 773 K | 916.6           | 529.3                    | 65.3                             | 22.7         | 12           |
| CP 773 K | 917.9           | 530.7                    | 62.1                             | 28.7         | 9.2          |
| CS 773 K | 916.9           | 529.2                    | 49.8                             | 41.9         | 8.3          |
| C 773 K  | 918.1           | 530.2                    | 35.83                            | 58.19        | 5.96         |

$\text{O}_A$  = lattice oxygen;  $\text{O}_B$  = chemically adsorbed oxygen or weakly bonded oxygen;

$\text{O}_C$  = oxygen in hydroxyl or surface adsorbed water.
